# Supplementary material for: The Copenhagen Infant Mental Health Programme – Development and testing of a pragmatic service-setting-based approach to screening and intervention
Source: Research Square preprint supplement (doi:10.21203/rs.3.rs-6698283/v1), 2025-07-22
Supplement: Supplementary file 1 [file 054d78432671f5a015b4c554.docx]

**Appendix 5.** Frequency of infant regulatory and developmental vulnerabilities identified by the Copenhagen Infant Mental Health Programme (CIMHP) (N=7,079).

| **Number of problems** | **Count** | **Percentage (%)** |
| --- | --- | --- |
| 0 | 3,703 | 52.3 |
| 1 | 1,780 | 25.1 |
| 2 | 860 | 12.1 |
| 3 | 402 | 5.7 |
| 4 | 180 | 2.5 |
| 5 | 82 | 1.2 |
| 6 | 24 | 0.3 |
| 7 | 23 | 0.3 |
| 8 | 14 | 0.2 |
| 9 | 6 | 0.1 |
| >10 | 5 | 0.1 |
