# Supplementary material for: The Copenhagen Infant Mental Health Programme – Development and testing of a pragmatic service-setting-based approach to screening and intervention
Source: Research Square preprint supplement (doi:10.21203/rs.3.rs-6698283/v1), 2025-07-22
Supplement: Supplementary file 2 [file 08d50ae892db5272ce8982b7.docx]

**Appendix 4. Questionnaire to the community health nurses.**

| **Domain and sub-domian** | **Item** | **Response categories** |
| --- | --- | --- |
| **Background** | | |
|  | How long have you been a health nurse? | < 5 years  > 5 years |
| **Your previous experiences and practice** | | |
|  | Have you worked in a pediatric department or a child psychiatric department? | Yes  No |
|  | Have you received training in mental health for 0–3-year-olds during your education? | If yes, please specify which ones here  No |
|  | Have you received training in mental health for 0–3-year-olds as part of your continuing education? | If yes, please specify which ones here  No |
|  | Have you previously used the BOEL test? | Yes  No |
|  | Have you previously used standardized tools to detect mental vulnerability in children between 8 and 12 months? | If yes, please specify which ones here  No |
|  | Is it usually your overall clinical assessment that forms the basis when determining whether a child around 12 months old needs intervention to address mental vulnerability? | Yes  No  Please specify |
| **The CIMHP education program** | | |
| Kick-off meeting | Was the introduction to CIMHP 2018 sufficient? | Yes  If not, please specify what you think is missing |
| Course day 1 | Do you think the scope and content of the training on course day 1 was sufficient? | Yes  If not, please describe what you missed |
| Exercises in using the CIMHP program between course day 1 and 2 | Was the introduction to the use of the CIMHS assessment sufficient? | Yes  If not, please describe what you missed |
|  | Have you used internal collaboration within your municipality to strengthen your skills and gain shared experiences in using the CIMHP between course day 1 and 2? | Yes  No  Please specify |
| Course day 2 | Do you think the scope and content of the training on course day 2 was sufficient? | Yes  If not, please describe what you missed |
| **Your experiences with using the CIMHP program in your daily practice** | | |
|  | Have you conducted more than 5 CIMHS assessments at this point? | Yes  No |
|  | Do you generally think that the CIMHS assessment helps you get an overview of the child's need for extra support/intervention at 9-10 months? | Yes  No  Please elaborate |
|  | Do you think that the CIMHP helps you communicate with parents about the child's needs? | Yes  No  Please elaborate |
|  | Do you find that parents consider the CIMHS assessment to be an advantage compared to usual practice? | Yes  No  Please elaborate |
|  | Do you think that the CIMHP helps you in planning an intervention for the child? | Yes  No  Please elaborate |
|  | Do you think there is a need for translation into another language, such as English? | If yes, please suggest which languages.  No |
|  | Is there a need for changes in the actual assessment form? | I have answered this question in the previous survey.  If yes, please suggest changes here that will improve understanding.  No |
|  | Is there a need for changes in the detailed text of the assessment form? | I have answered this question in the previous survey.  If yes, please suggest changes here that will improve understanding.  No |
|  | Is there a need for changes in the manual for completing the assessment form (see manual page 9) | If yes, please suggest changes here that will improve understanding.  No |
|  | Have you used the manual during feedback of the CIMHS assessment or during planning of additional support/intervention? | Yes  No  Please elaborate |
|  | Do you feel there is a need for the guidelines to be changed? | If yes, then write suggestions for changes here.  No |
|  | Additional/detailed comments on your evaluation of the CIMHP |  |
