# Supplementary material for: The Copenhagen Infant Mental Health Programme – Development and testing of a pragmatic service-setting-based approach to screening and intervention
Source: Research Square preprint supplement (doi:10.21203/rs.3.rs-6698283/v1), 2025-07-22
Supplement: Supplementary file 3 [file 36d2b55c1cfaf298407d061a.docx]

**Appendix 3.** Overview of data sources and variables

*The Child Health Database (CHD)*

The CHD provided information from the CHN’s home visits based on information from parents and CHN’s observations and examinations of the child as well as observations of the relation between parent and child. We included the 28 items of the CIMHP scale covering problems of sleep, feeding and eating, expression and regulation of emotions, attention and concentration, motor development and activity, communication and social interaction, curiosity and interests, and language. The items were coded one to signify presence of a problem, and zero for non-presence of a problem.

Due to differences in local record systems, data on the CIMHP screening were available electronically in the CHD from eleven of the seventeen participating municipalities. The remaining variables were available from all municipalities.

*The Danish Medical Birth Register (MBR)*

Analyses were based on available data from the Danish Medical Birth Register (MBR), compromising n=45,424 for the entire population and n=2,876 for the study population. The following variables were applied: Gestational age, categorized as <31, 32-36 and ≥37 weeks, and dichotomized into premature birth (<37 weeks) vs. not premature birth (>37 weeks); birth weight, categorized as <1500, 1500-2500, ≥2500 grams, and dichotomized into low birth weight (<2500 grams) vs. high (>2500 grams). Further, a variable on neonatal complications was constructed on MBR data on any diagnoses of neonatal sepsis and/or if the child had received neonatal respirator treatment. The variable was dichotomized into any neonatal complications vs. none.

*Other Danish Sociodemographic registers*

Information on parental ethnicity, family structure, and parental work status were retrieved from sociodemographic registers. Family structure was defined based on whether the parents were living together at the time of the child’s birth vs. parents not living together. Parental ethnicity was categorized as both parents born in Denmark, one parent born in Denmark, or both parents born outside Denmark with an additional dichotomized version: at least one parent born in Denmark vs. both parents born outside Denmark. Parental work status was categorized as both working; one parent working/one not working; or both parents not working, and a dichotomized version: at least one working vs. both not working. Parental years of schooling were dichotomized into both parents with <10 years of schooling vs. one or both parents with >10 years of schooling.
