# Supplementary material for: The Copenhagen Infant Mental Health Programme – Development and testing of a pragmatic service-setting-based approach to screening and intervention
Source: Research Square preprint supplement (doi:10.21203/rs.3.rs-6698283/v1), 2025-07-22
Supplement: Supplementary file 4 [file 673e5ab3b4c57ca7c7c854cc.docx]

**Appendix 2. Overview of the education and training in the use of the Copenhagen Infant Mental Health Programme, CIMHP**

**Day 1**

Introduction to the empirical background and the content of the CIMHP assessment, intervention and training

**3 months of training**

**Day 2**

Case-based training in using the CIMHP based on video material from the training period

Main educational topics:

- Group based analysis of selected video cases of CIMHP assessments
- Reflection of experiences concerning the use of the CIMHP in day-to-day practice
- Group based discussion of selected cases of CIMHP assessments focusing on intervention
- Practical issues on using the CIMHP guidelines according to solitary and complex regulatory and developmental vulnerabilities

Main educational topics:

- Infant development
- Prognostic factors for developmental and regulatory problems in preschool ages
- Early signs of mental vulnerability
- The CIMHP assessment and feedback

A. Infant with few problems

B. Infant with complex problems

- Theoretical and empirical background for counseling parents in relation to specific infant vulnerabilities
- Theoretical and empirical background and principles for intervention targeted infants’ mental health vulnerabilities
- Review of the CIMHP guidelines for a short and focused intervention in the existing municipality service-setting
