# Supplementary material for: The Copenhagen Infant Mental Health Programme – Development and testing of a pragmatic service-setting-based approach to screening and intervention
Source: Research Square preprint supplement (doi:10.21203/rs.3.rs-6698283/v1), 2025-07-22
Supplement: Supplementary file 5 [file a837a8780175509a90728ee0.docx]

**Appendix 1. Example of the guidelines of the Copenhagen Infant Mental Health Programme, CIMHP - Motor development and activity**

| **Motor development and activity** | **Checklist** |
| --- | --- |
| **Introductory clarification** | **Exploring the vulnerabilities identified?**  How long have the problems been going on? Do the problems vary? Does the child have other problems, e.g. with regard to concentration and attention? The extent is clarified with the parents, and the parents’ suggestions of what is causing the problems is included.  **Any developmental problems?**  If the child has developmental problems (language, communication and interaction), the problems must be seen in the context of the child's general development, and the intervention must be organised based on the child's overall developmental needs.  *See guidelines for the respective areas (curiosity and interest, concentration and attention, language, communication and interaction).*  **Any regulatory problems?**  If there are concurrent problems with regulation of sleep and eating, the overall plan must include a schedule for the parents with suggestions for establishing a circadian rhythm. This schedule serves as the basis for the parents’ documentation and reporting throughout the process.  *See guidelines for the respective areas (sleep, eating problems).*  **Has the child concurrent emotional or relational problems?**  If the child has emotional or relational problems, it must be clarified how these are to be prioritised in the intervention, and how the problems with motor development and function can be handled in parallel with a specific intervention aimed at the parent-child relationship.  *See guidelines for the respective areas (emotional problems and problems with communication and interaction).*  **Parents’ needs/motivations and wishes**  What do the parents consider to be the biggest problem? Do the community health nurse and the parents agree on the extent and nature of the problem?  **Agreements**  Agreement on 1) a 6-week course with 2–4 visits; 2) evaluation after the 5th week; 3) communication with the daycare or other people in contact with the child and family: When? How?; 4) agreement on goals for the intervention; or 5) what is to happen afterwards if there is an effect and if there is not a sufficient effect. |
| **Basis**  *The child has not reached age-appropriate motor milestones* (sitting without support, crawling, pulling itself up to stand. Exploring the surroundings sensorimotorically: handling toys, putting things in its mouth).  The child’s general level of activity is reduced (there is little spontaneous movement: the child sits where it is placed and lies where it is laid).  The child is characterised by hyperactivity as a pervasive behavioural trait, is physically restless, cannot sit still and, for example, constantly moves its legs when sitting in a highchair.  The child makes sudden and unpredictable, unmotivated movements/actions (impulsivity: for no apparent reason, it throws toys, eating utensils or other objects) or makes sudden and unexpected movements (e.g. suddenly throws itself back in the chair). | **The intervention in general**  The intervention is based on helping the parents to document the child’s motor development and pattern of activity, and understanding the child’s circumstances based on its current stage of development. The child’s immature motor development and regulation are in focus, and the parents are advised on how to stimulate the child and regulate its motor activity, ideally in collaboration with physiotherapists/occupational therapists in the municipality.  The parents are given feedback based on their own experiences/video recordings.  Throughout the process, the parents are trained in sensitive parenting (see earlier) with a focus on the child’s developmental and regulatory difficulties. They are also trained to support/ensure the child’s overall development (linguistic, cognitive, social and emotional) to prevent the child from developing secondary emotional problems.  The parents are trained to follow and support the child’s initiatives by putting words to its actions and feelings. The parents put their own actions into words.  The hypoactive or hyperactive child is regulated by positive affirmation and positive leadership. Principles from the Marte Meo method can be used here.  To the extent possible, video recordings are used to support the parents’ experiences and observations. The community health nurse’s video recordings of the child during play and interaction with one of the parents may be included. |
| **Content** | **Sessions/visits (2–6 visits/6 weeks)**  A diary template can be provided, in which the parents document the child’s spontaneous behaviour and motor activity during the day over five days. Parents are encouraged to record videos that highlight the child’s motor development and patterns of activity, i.e. spontaneous behaviour when playing alone and during social interaction. Alternatively, the community health nurse will record videos during the home visit.  Analysis of diary and video recordings from week 1 together with the parents. Guidance on helping the child by means of structure and stimulation with regular activities and alternating rest periods. The parents are encouraged to include 2–3 short rituals each day, where the mother/father and child play or share an activity based on the child’s current motor development needs and need for regulation of motor activity.  Specific examples are given to the parents with regard to everyday activities where they support, stimulate and regulate the child’s motor development and function.  The parents’ experiences form the basis for subsequent feedback and guidance. Alternatively, the community health nurse will record videos during the home visit.  Analysis of diary/video recordings from week 2/3. The community health nurse may be able to supplement the diary with video recordings during one of the recommended activities during the home visit.  The plan is adjusted according to the parents’ experiences and the child’s reactions.  The parents are guided in structured activities/play with the child and document the child’s reactions. Parents are encouraged to document both positive and negative reactions in the child and how they themselves respond. They are encouraged to video record their contact with the child and document their own experiences in connection with this.  Analysis of diary/video recordings from week 3/4. The effect of intervention weeks 1-4 is evaluated. The plan is adjusted accordingly.  To be re-evaluated after two weeks (week 5/6).  Assessment: Is there a satisfactory effect? Do child and parents need more/something else? If yes, referral to an intervention elsewhere is discussed.  Passing on to others who are in contact with the child. |
